# Supplementary material for: An expeditious and highly efficient synthesis of substituted pyrroles using a low melting deep eutectic mixture
Source: Royal Society of Chemistry journal article supplement (doi:10.1039/d1ob01618k), 2021-01-01

## Supporting Information

### **An expeditious and highly efficient synthesis of substituted pyrroles using a low melting deep eutectic mixture**

Shakeel Alvi<sup>a</sup> and Rashid Ali<sup>a\*</sup>

<sup>a</sup>Department of Chemistry, Jamia Millia Islamia, Jamia Nagar, Okhla, New Delhi-110025, India

Phone: +91-7011867613; E-mail: [rali1@jmi.ac.in](mailto:rali1@jmi.ac.in)

### Table of contents

|                                                                           |     |
|---------------------------------------------------------------------------|-----|
| <sup>1</sup> H-NMR spectrum of compound <b>10</b>                         | S2  |
| <sup>1</sup> H-NMR spectrum of compound <b>12a</b>                        | S2  |
| <sup>1</sup> H-NMR spectrum of compound <b>12b</b>                        | S3  |
| <sup>1</sup> H-NMR spectrum of compound <b>12c</b>                        | S3  |
| <sup>1</sup> H-NMR spectrum of compound <b>12d</b>                        | S4  |
| <sup>1</sup> H-NMR spectrum of compound <b>12e</b>                        | S4  |
| <sup>1</sup> H-NMR spectrum of compound <b>12f</b>                        | S5  |
| <sup>1</sup> H-NMR spectrum of compound <b>12g</b>                        | S5  |
| <sup>1</sup> H-NMR spectrum of compound <b>12h</b>                        | S6  |
| <sup>1</sup> H-NMR spectrum of compound <b>12i</b>                        | S6  |
| <sup>1</sup> H-NMR spectrum of compound <b>14a</b>                        | S7  |
| <sup>1</sup> H-NMR spectrum of compound <b>14b</b>                        | S7  |
| <sup>1</sup> H-NMR spectrum of compound <b>14c</b>                        | S8  |
| <sup>1</sup> H-NMR spectrum of compound <b>14d</b>                        | S8  |
| <sup>1</sup> H-NMR and <sup>13</sup> C-NMR spectrum of compound <b>20</b> | S9  |
| HRMS spectrum of compound <b>20</b>                                       | S10 |
| <sup>1</sup> H-NMR spectrum of compound <b>22</b>                         | S10 |
| <sup>1</sup> H-NMR and <sup>13</sup> C-NMR spectrum of compound <b>27</b> | S11 |
| HRMS spectrum of compound <b>27</b>                                       | S12 |
| <sup>1</sup> H-NMR spectrum of compound <b>31</b>                         | S12 |
| <sup>13</sup> C-NMR and HRMS spectrum of compound <b>31</b>               | S13 |
| <sup>1</sup> H-NMR and <sup>13</sup> C-NMR spectrum of compound <b>32</b> | S14 |
| <sup>1</sup> H-NMR spectrum of compound <b>35</b>                         | S15 |
| <sup>1</sup> H-NMR spectrum of compound <b>37</b>                         | S15 |

# <sup>1</sup>H-NMR spectrum of compound 10

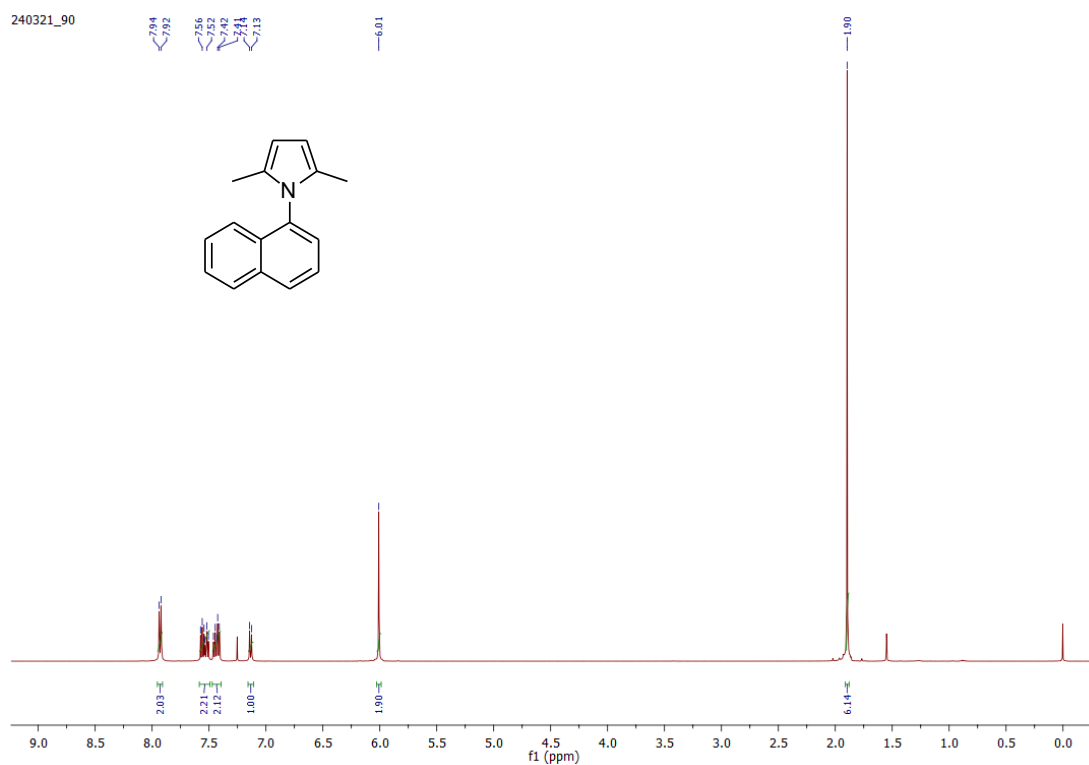

# <sup>1</sup>H-NMR spectrum of compound 12a

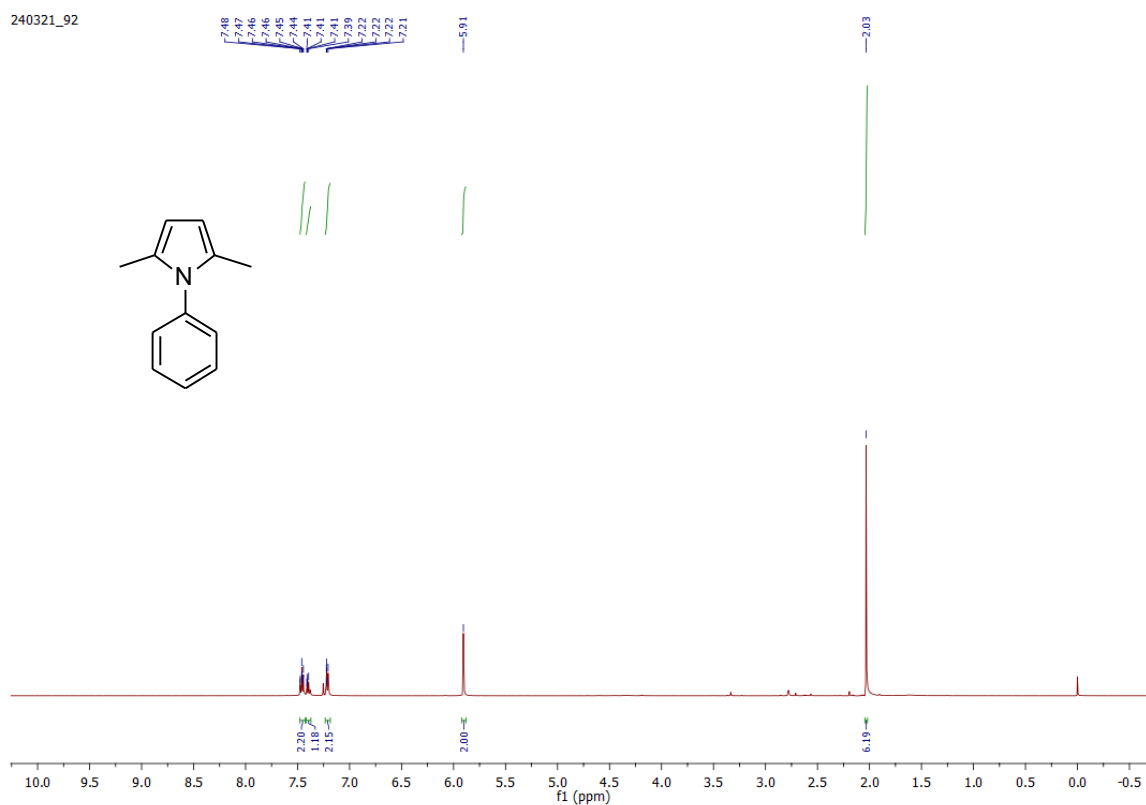

### <sup>1</sup>H-NMR spectrum of compound 12b

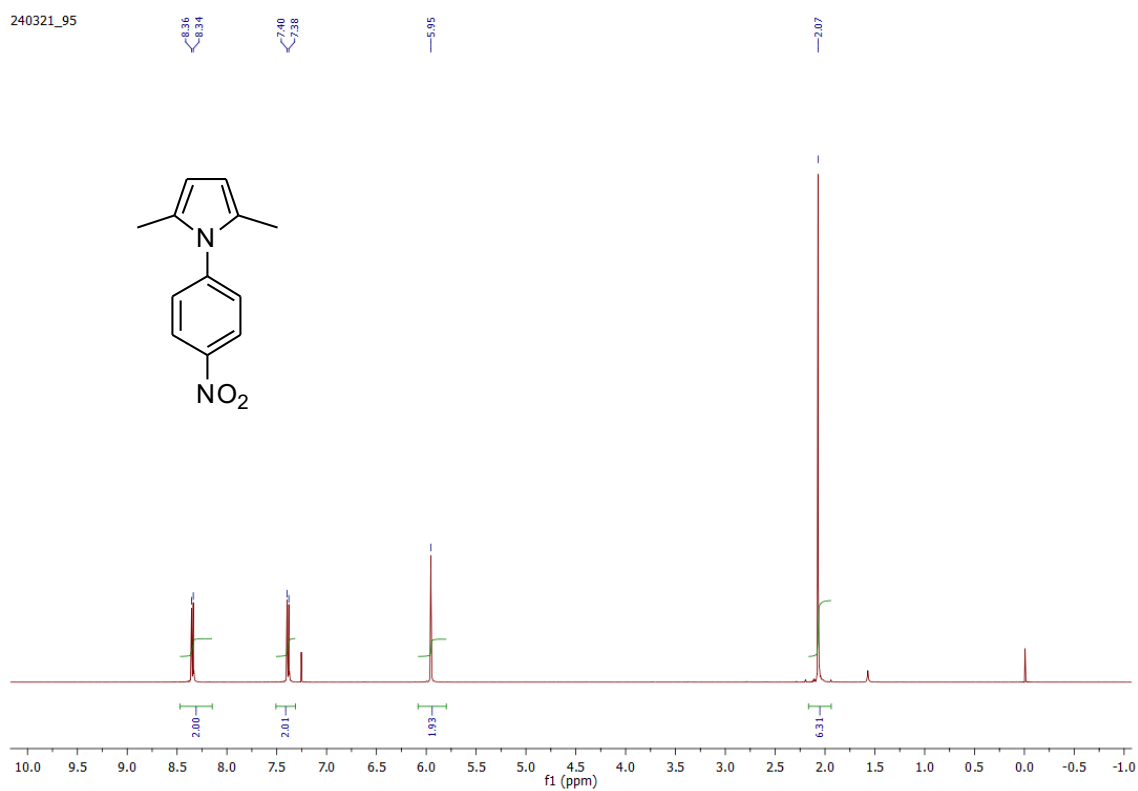

### <sup>1</sup>H-NMR spectrum of compound 12c

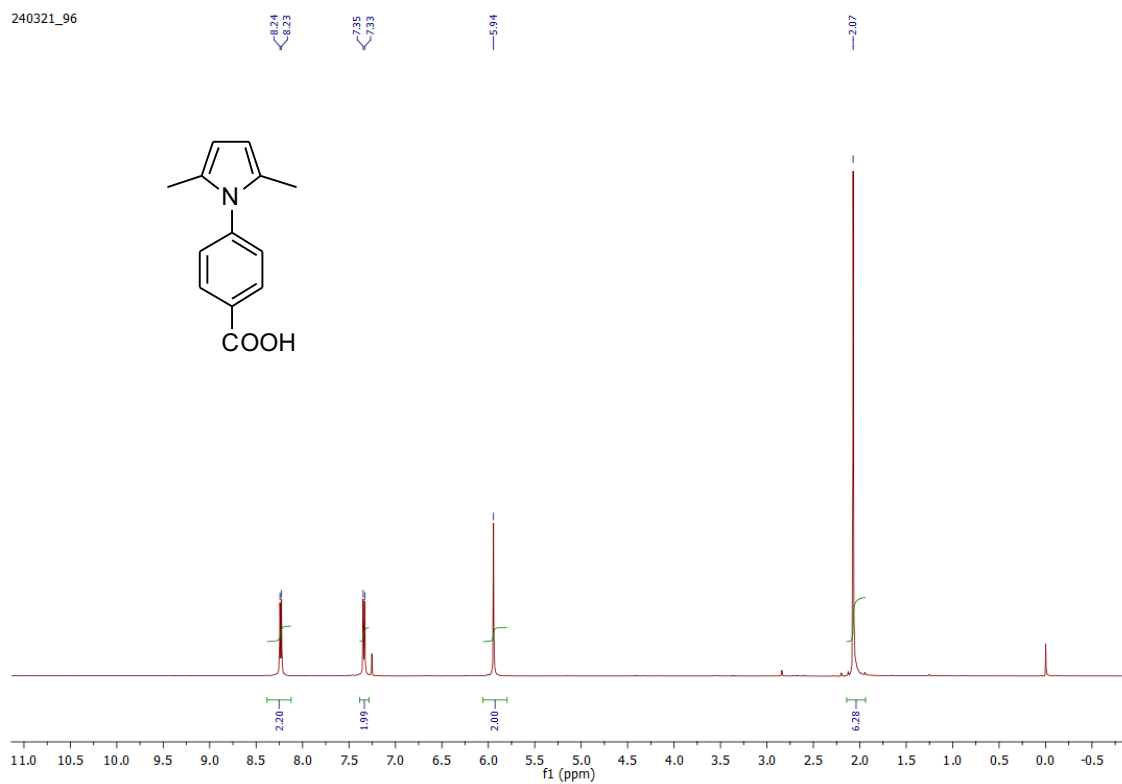

# <sup>1</sup>H-NMR spectrum of compound 12d

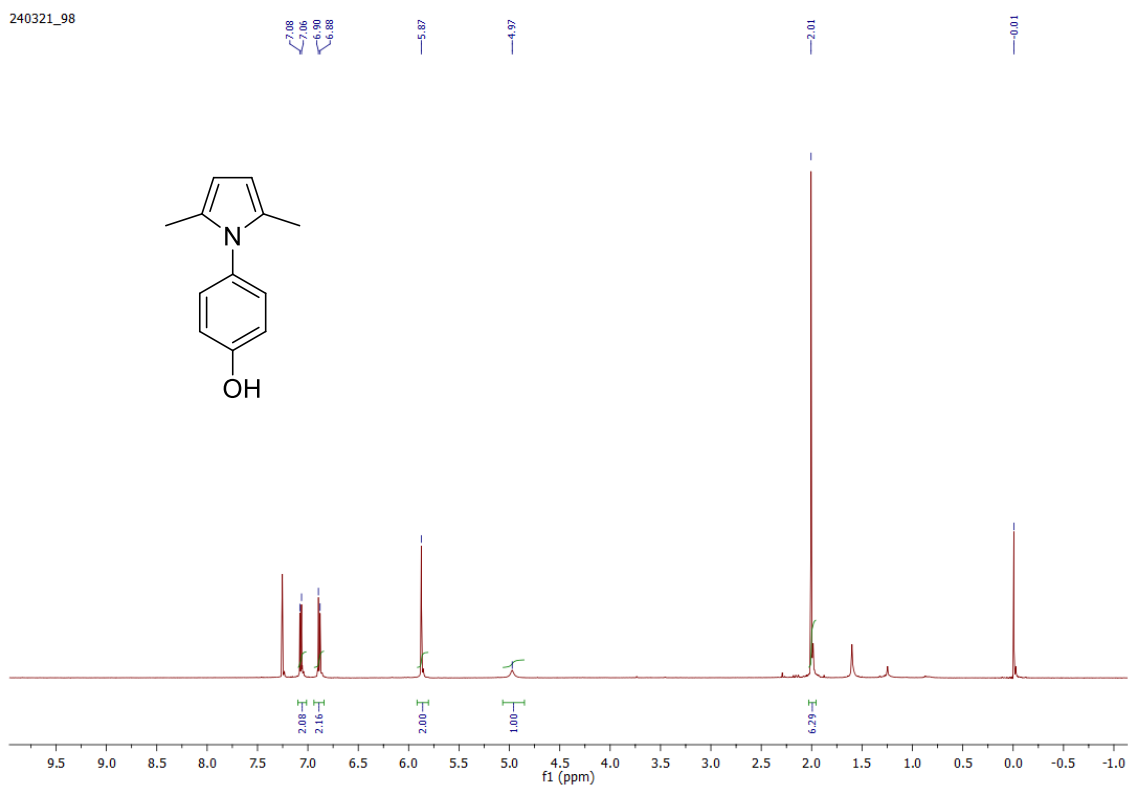

# <sup>1</sup>H-NMR spectrum of compound 12e

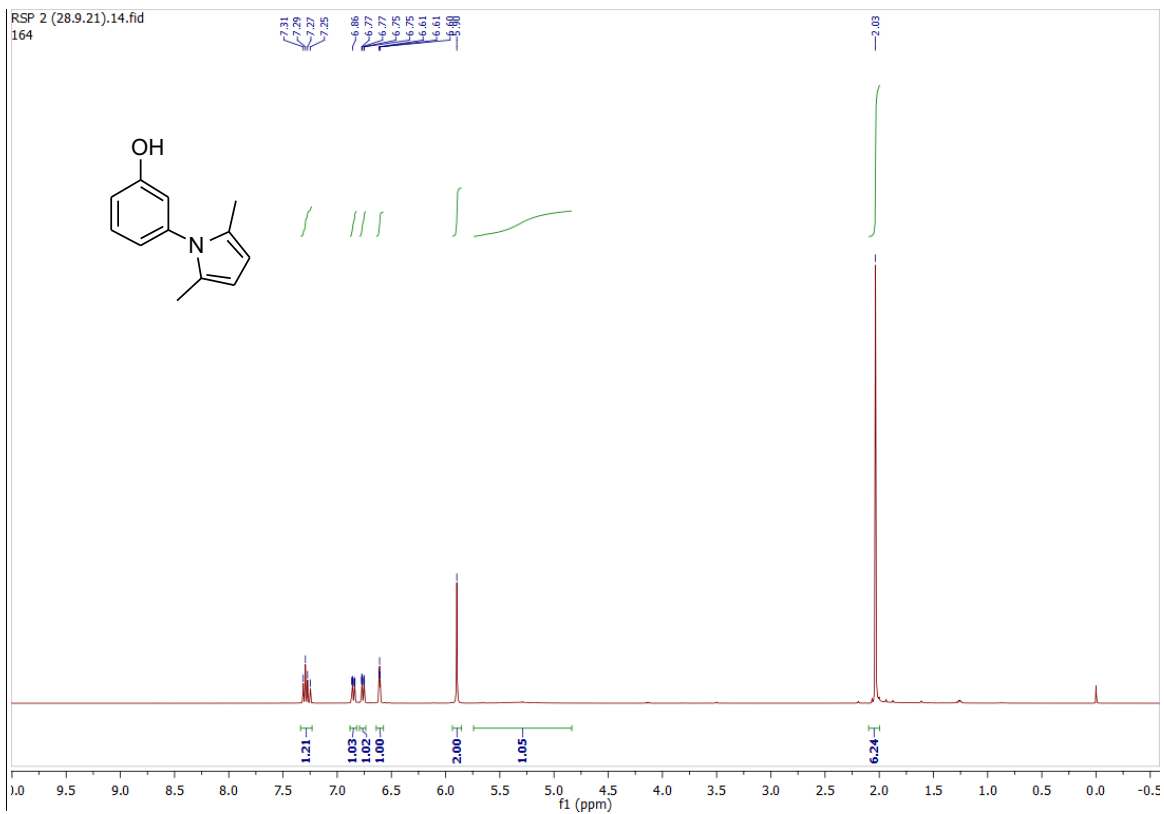

# <sup>1</sup>H-NMR spectrum of compound 12f

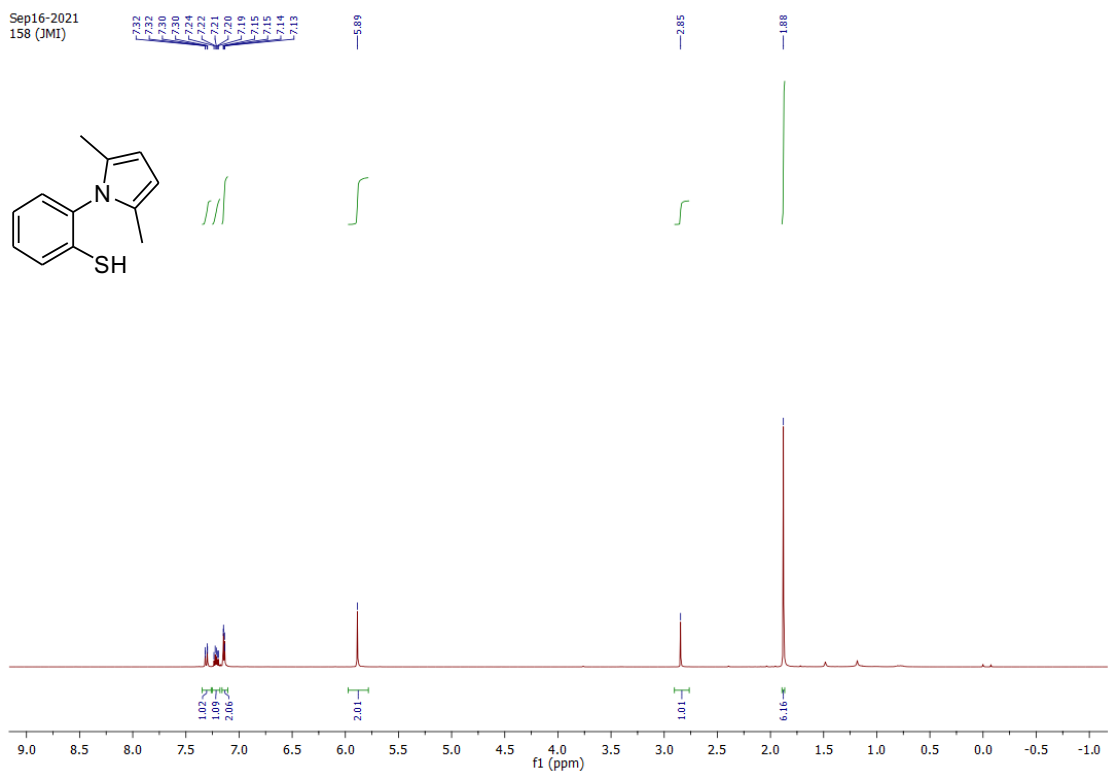

# <sup>1</sup>H-NMR spectrum of compound 12g

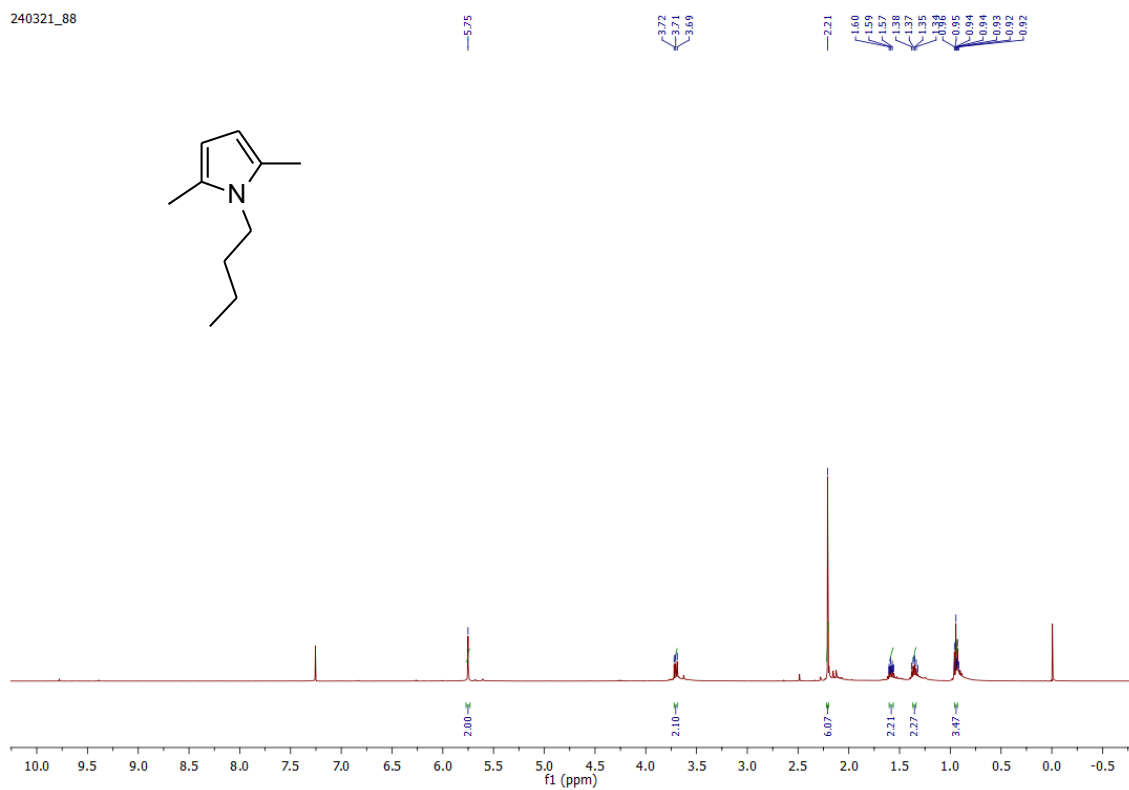

# <sup>1</sup>H-NMR spectrum of compound 12h

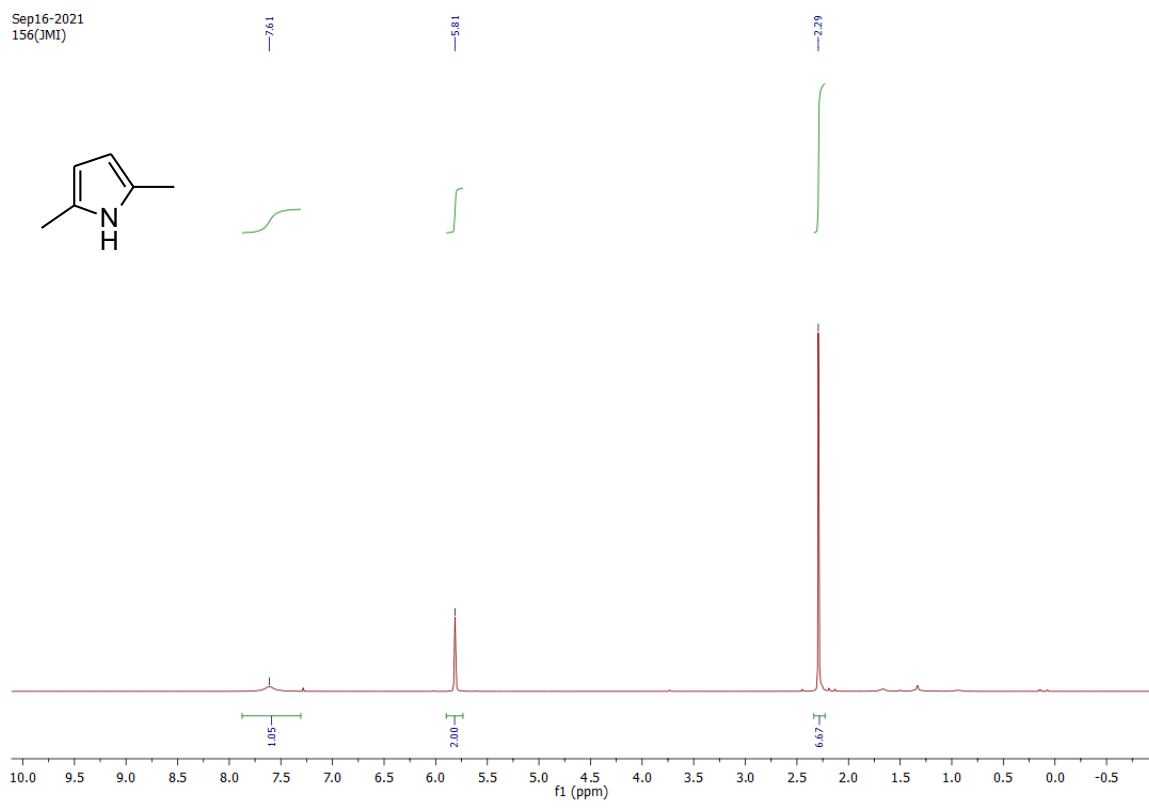

# <sup>1</sup>H-NMR spectrum of compound 12i

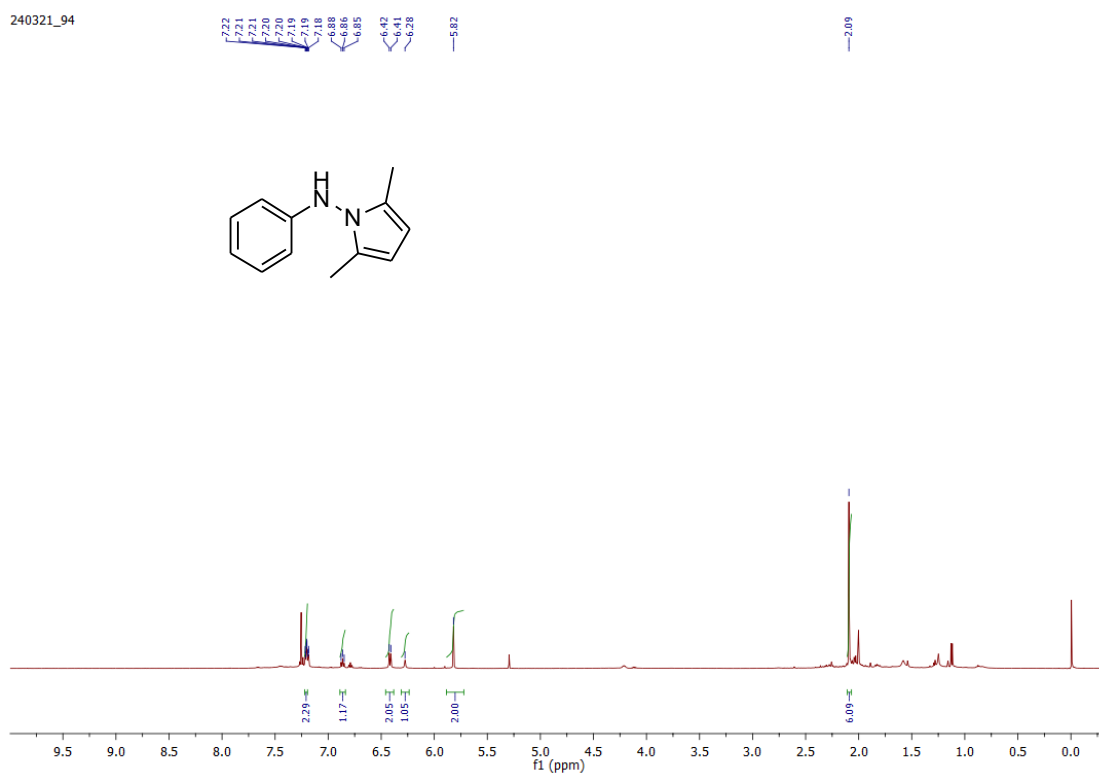

# <sup>1</sup>H-NMR spectrum of compound 14a

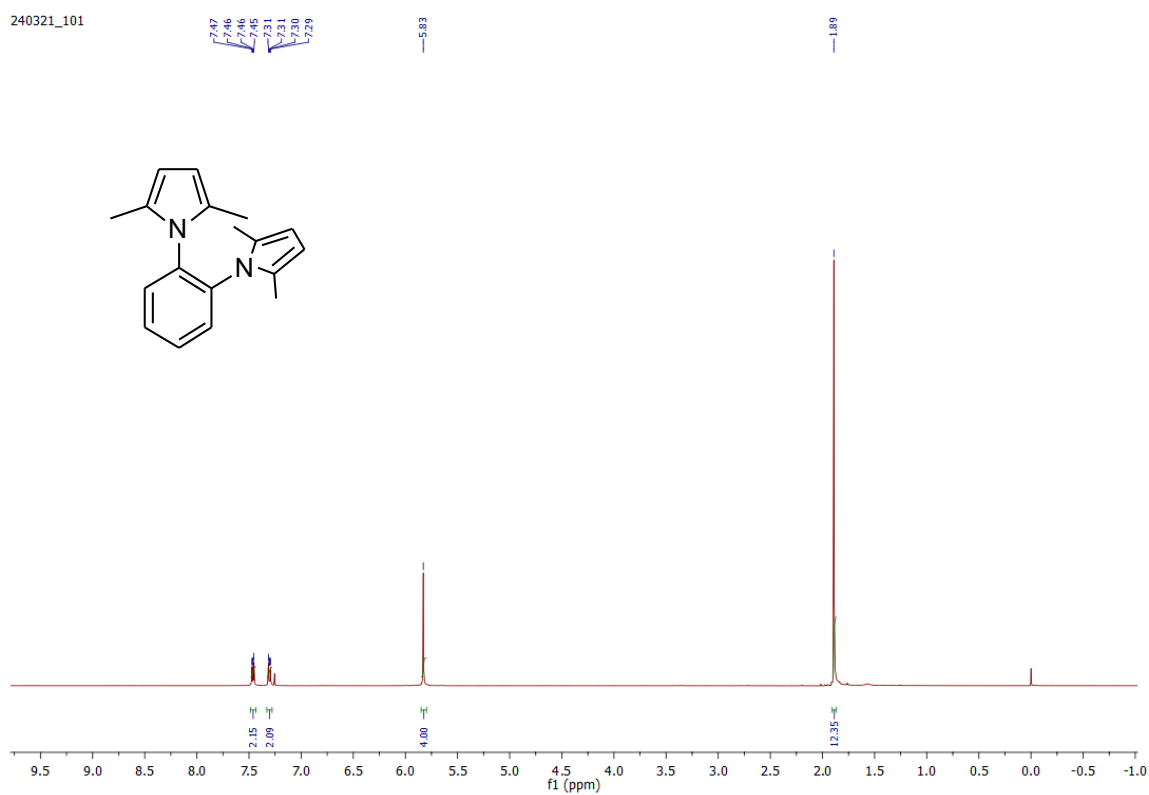

# <sup>1</sup>H-NMR spectrum of compound 14b

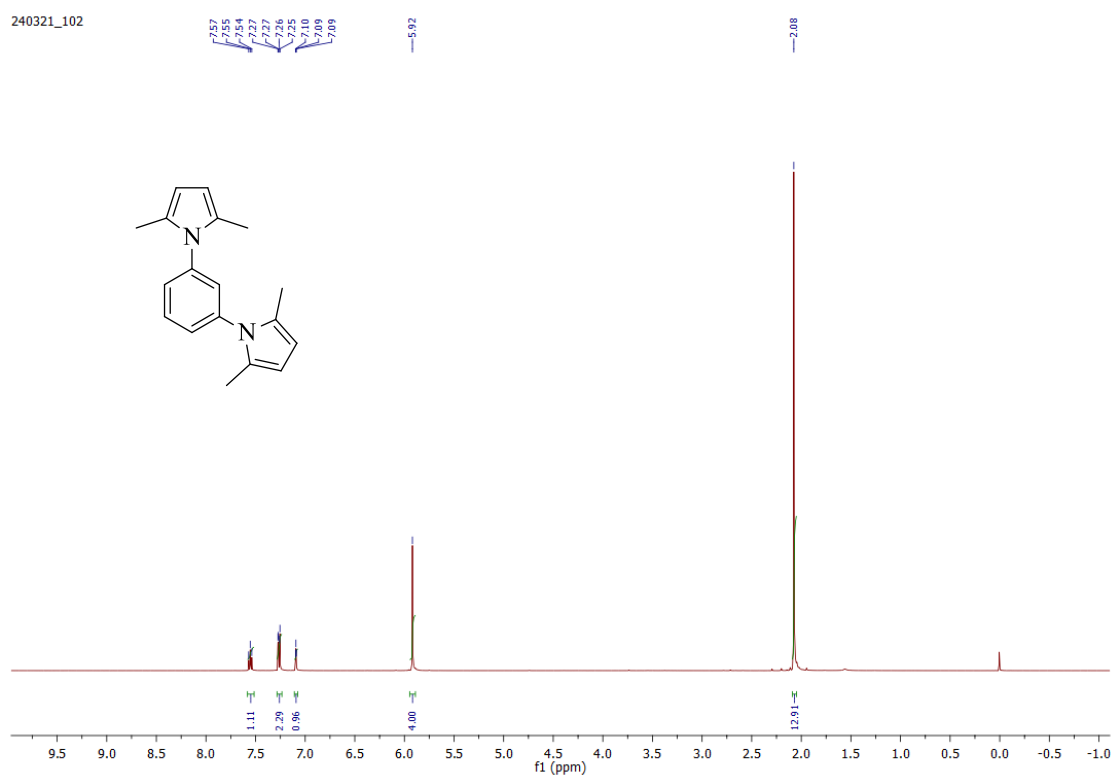

# <sup>1</sup>H-NMR spectrum of compound 14c

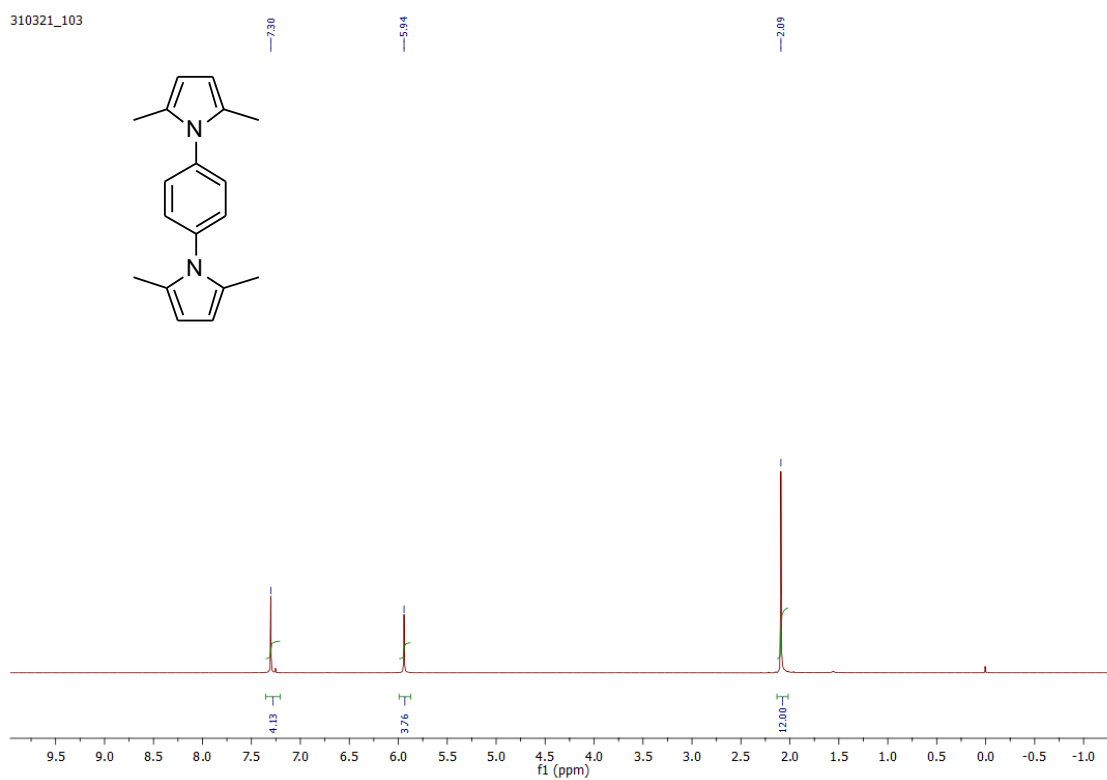

# <sup>1</sup>H-NMR spectrum of compound 14d

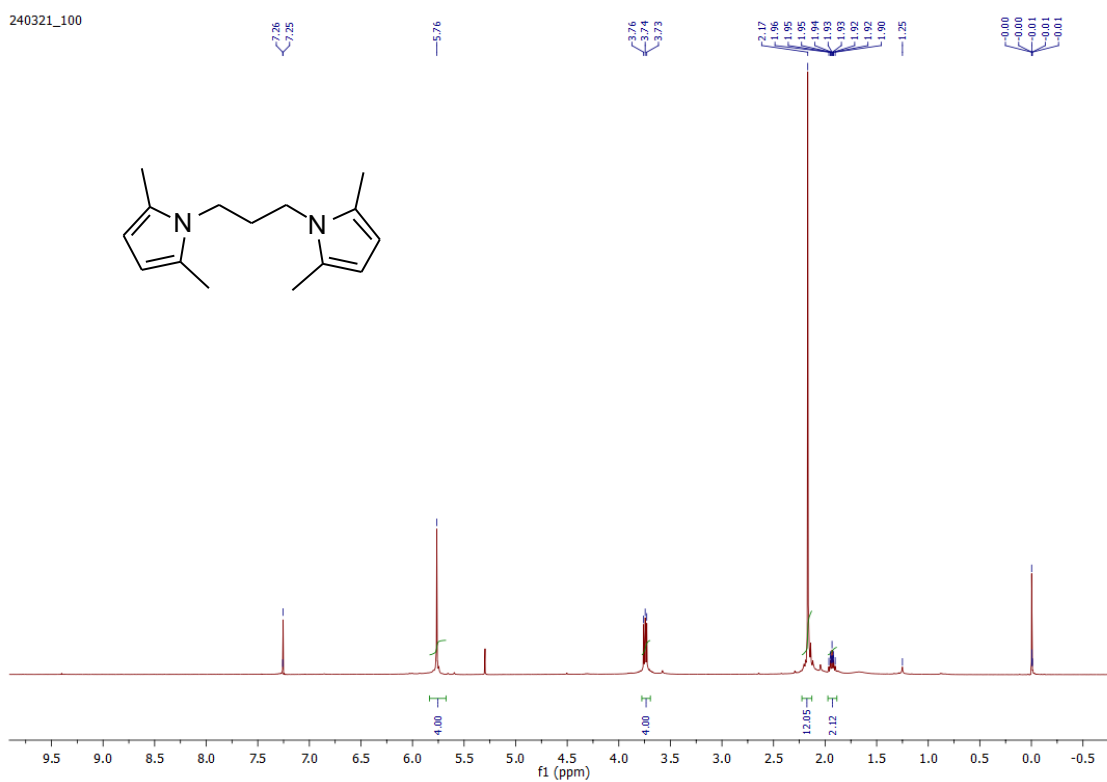



# <sup>1</sup>H-NMR spectrum of compound 20

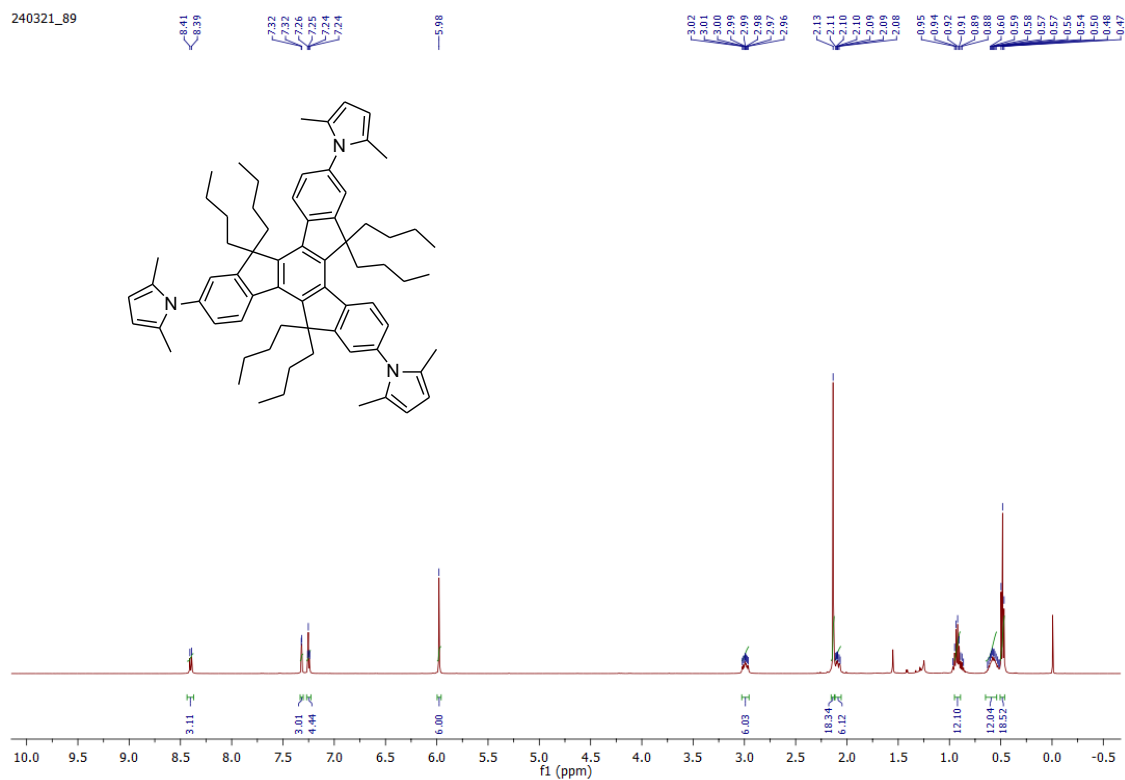

# <sup>13</sup>C-NMR spectrum of compound 20

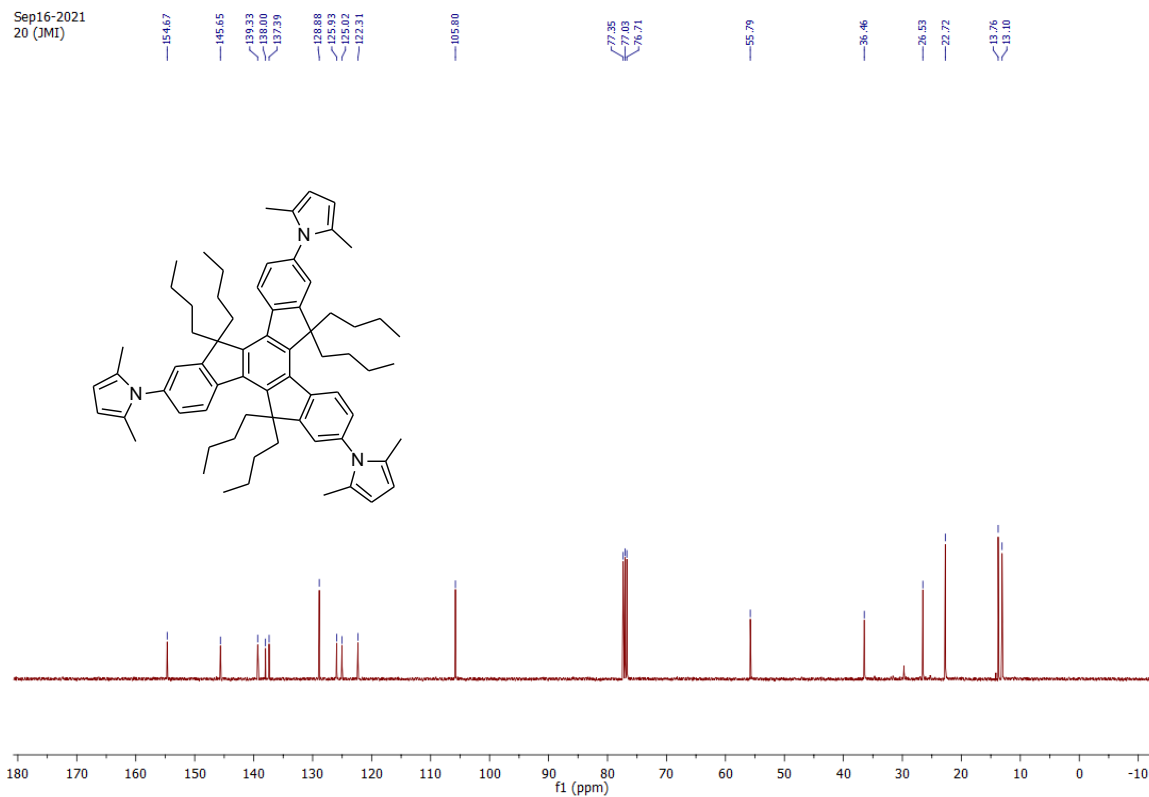

## HRMS of compound 20

| Sample Name   | JMI        | Position    | P1-A7       | Instrument Name | Instrument 1 | User Name              |                     |
|---------------|------------|-------------|-------------|-----------------|--------------|------------------------|---------------------|
| Inj Vol       | 5          | InjPosition |             | SampleType      | Sample       | IRM Calibration Status | Success             |
| Data Filename | JMI-20-2.d | ACQ Method  | UNION POS.m | Comment         |              | Acquired Time          | 17-09-2021 12:34:59 |

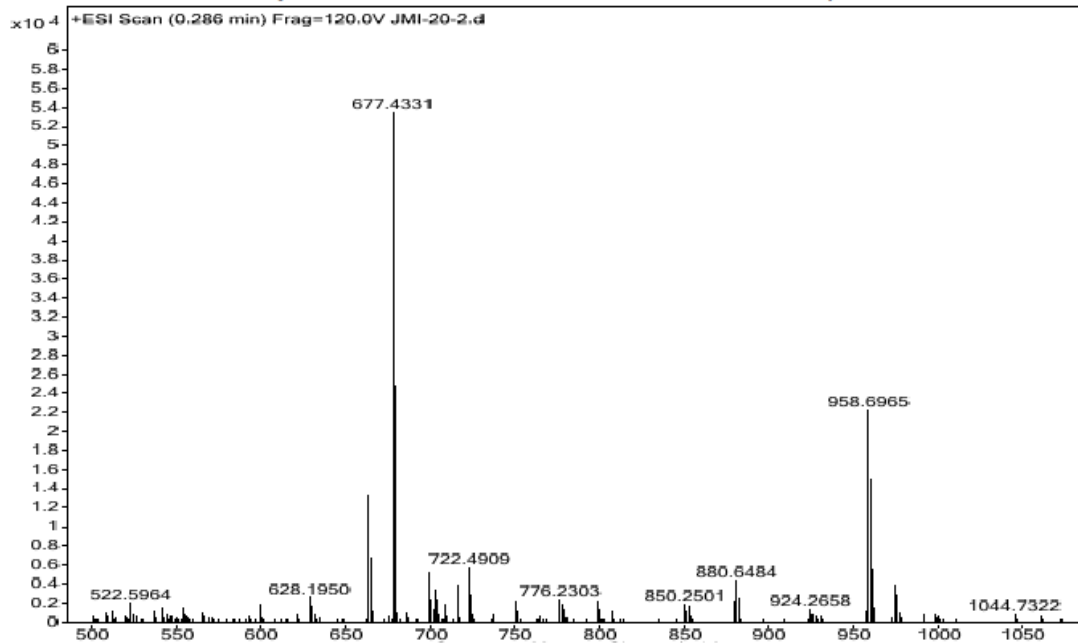

## <sup>1</sup>H-NMR spectrum of compound 22

12312020\_External  
48\_sx43

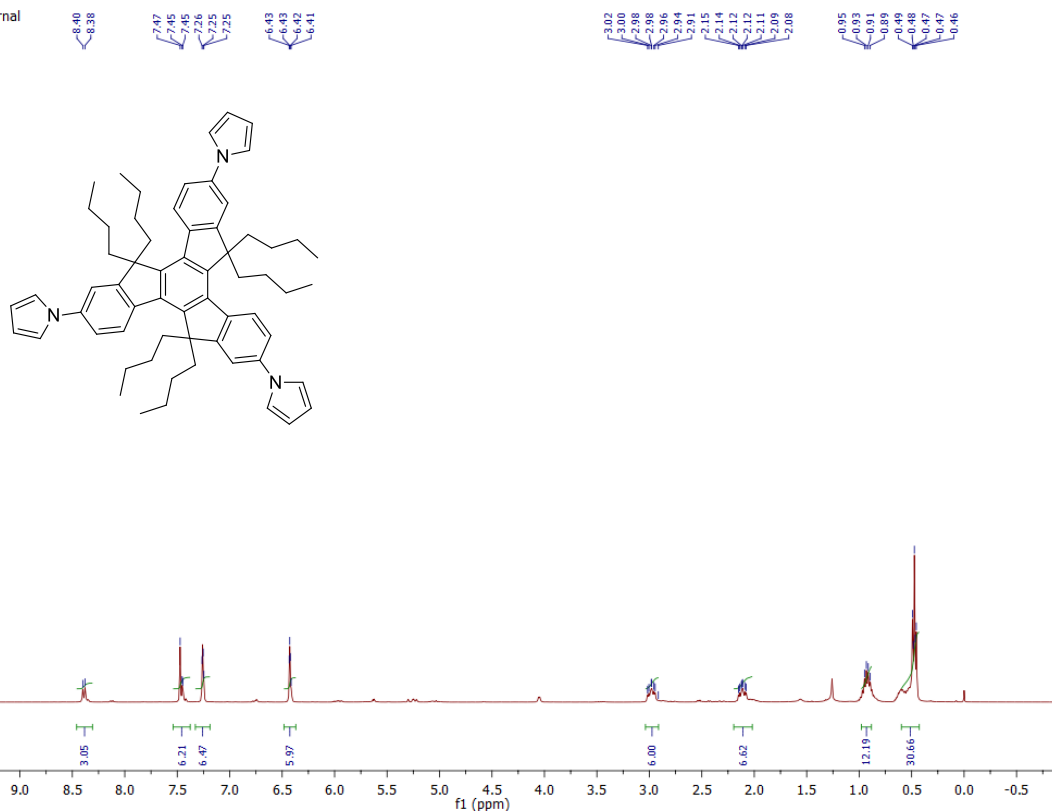

# <sup>1</sup>H-NMR spectrum of compound 27

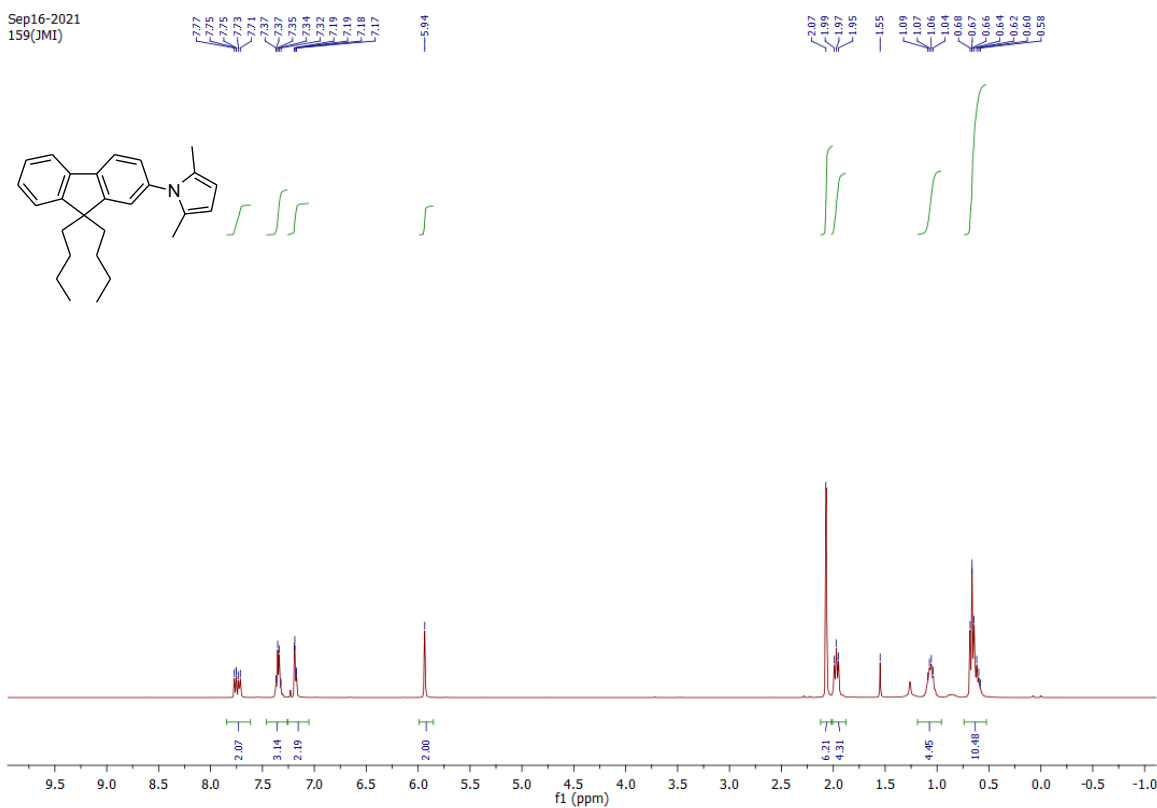

# <sup>13</sup>C-NMR spectrum of compound 27

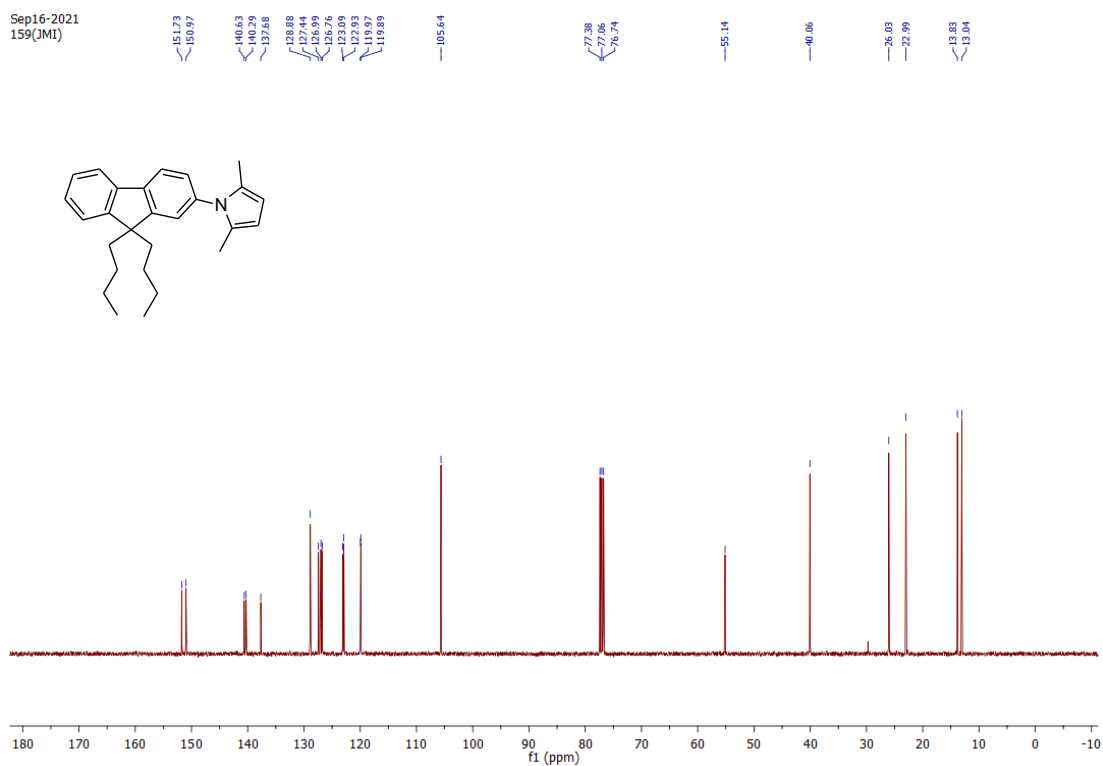

## HRMS spectrum of compound 27

| Sample Name   | JMI       | Position    | P1-B2       | Instrument Name | Instrument 1 | User Name              |                     |
|---------------|-----------|-------------|-------------|-----------------|--------------|------------------------|---------------------|
| Inj Vol       | 1         | InjPosition |             | SampleType      | Sample       | IRM Calibration Status | Success             |
| Data Filename | JMI-159.d | ACQ Method  | UNION POS.m | Comment         |              | Acquired Time          | 16-09-2021 17:05:36 |

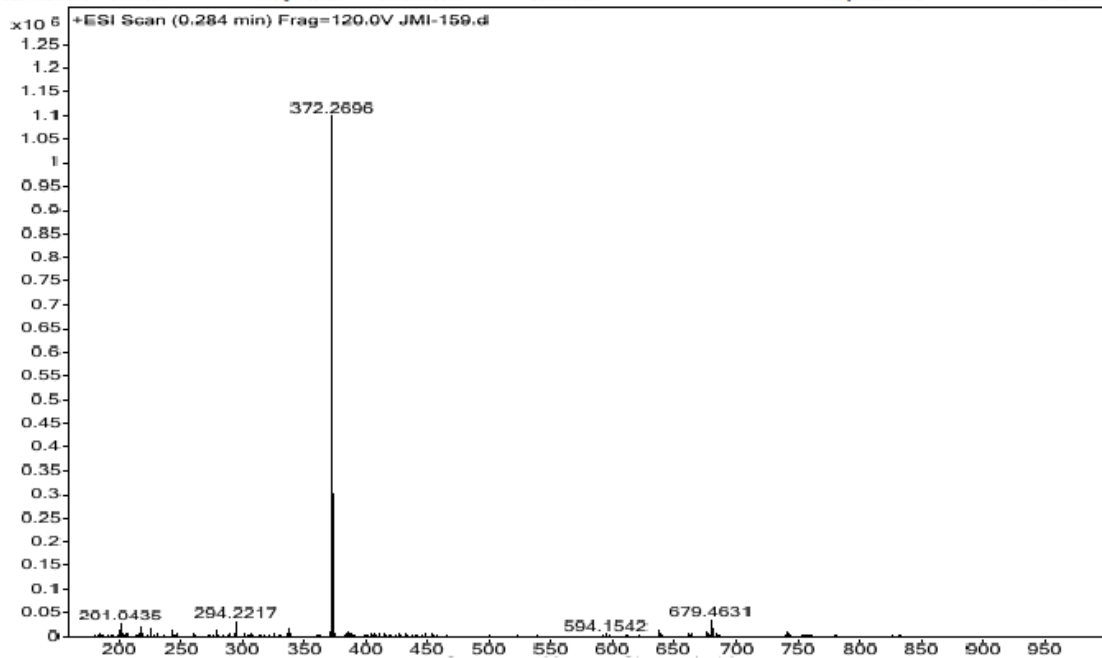

## <sup>1</sup>H-NMR spectrum of compound 31

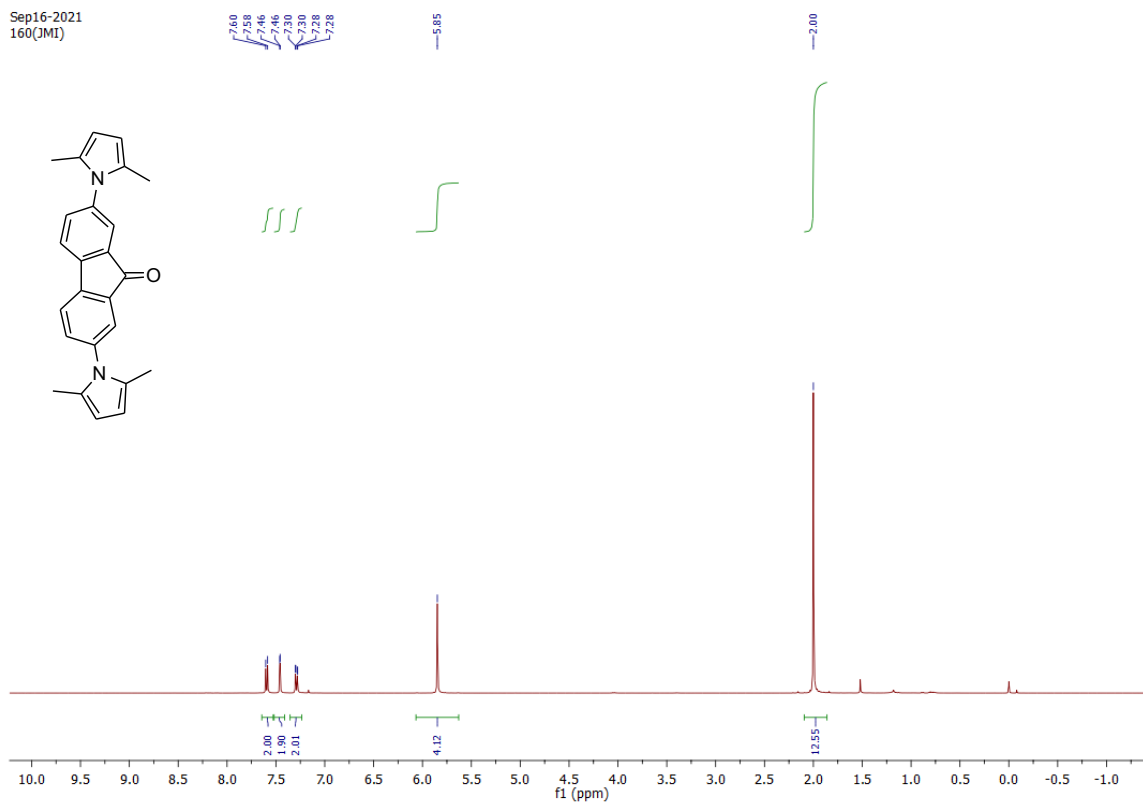

### <sup>13</sup>C-NMR spectrum of compound 31

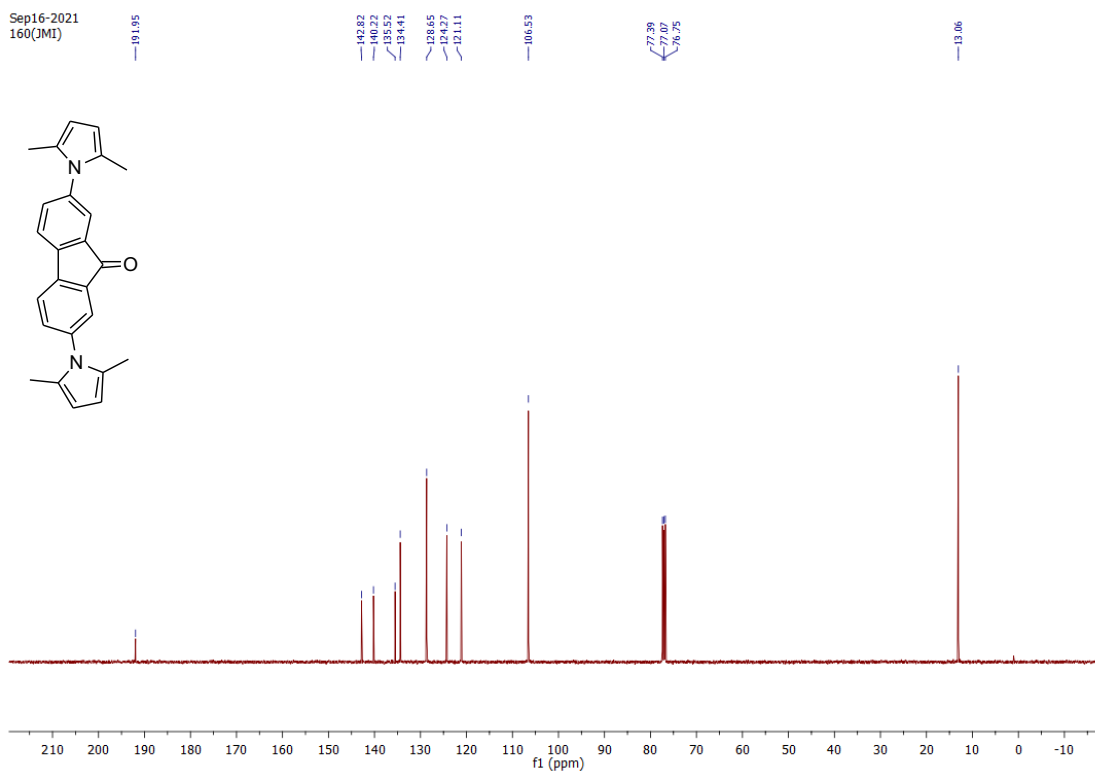

### HRMS spectrum of compound 31

| Sample Name   | JMI       | Position    | P1-B1       | Instrument Name | Instrument 1 | User Name              |                     |
|---------------|-----------|-------------|-------------|-----------------|--------------|------------------------|---------------------|
| Inj Vol       | 2         | InjPosition |             | SampleType      | Sample       | IRM Calibration Status | Success             |
| Data Filename | JMI-160.d | ACQ Method  | UNION POS.m | Comment         |              | Acquired Time          | 16-09-2021 17:03:05 |

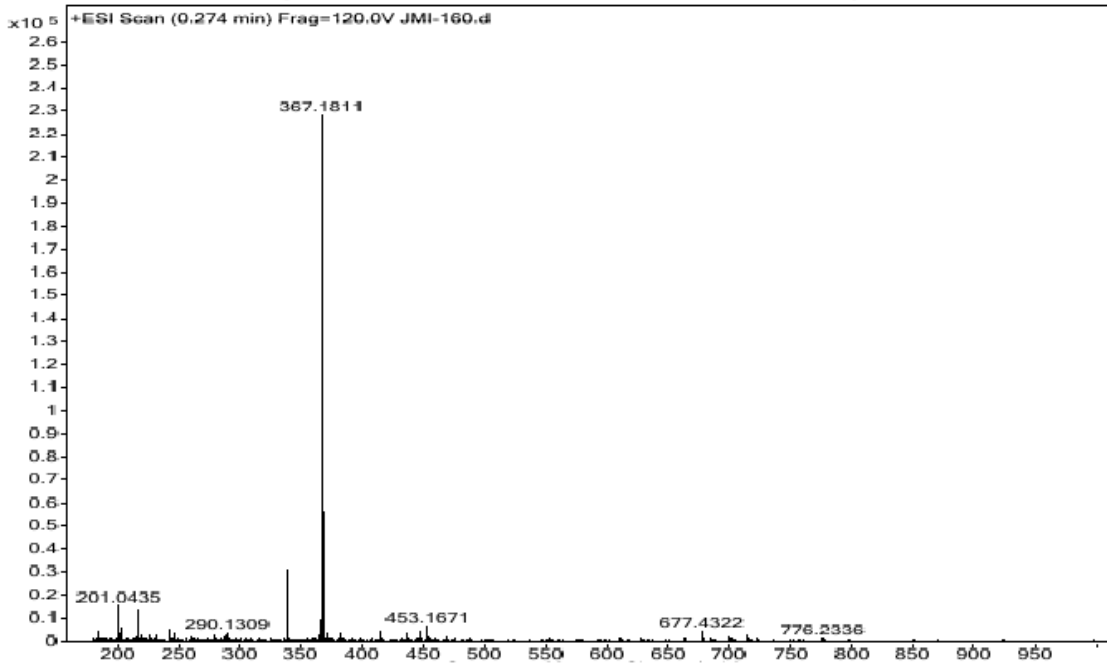

# <sup>1</sup>H-NMR spectrum of compound 32

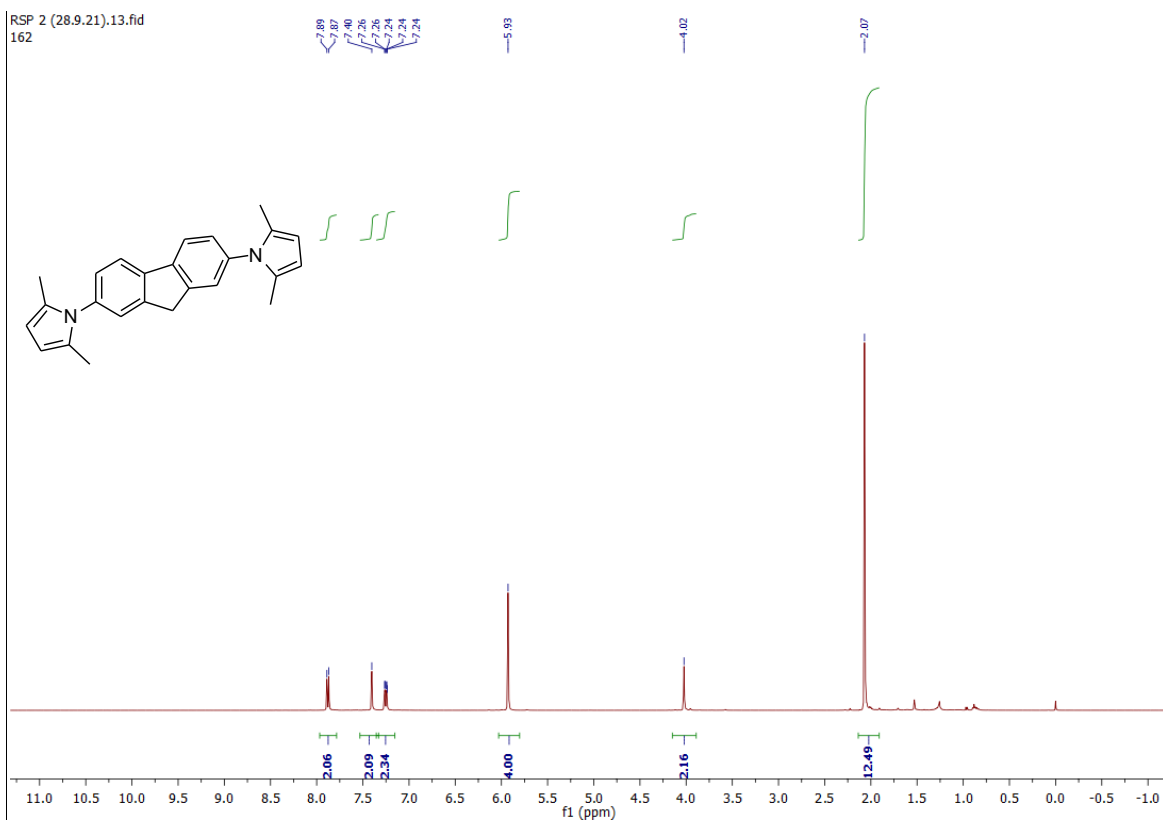

# <sup>13</sup>C-NMR spectrum of compound 32

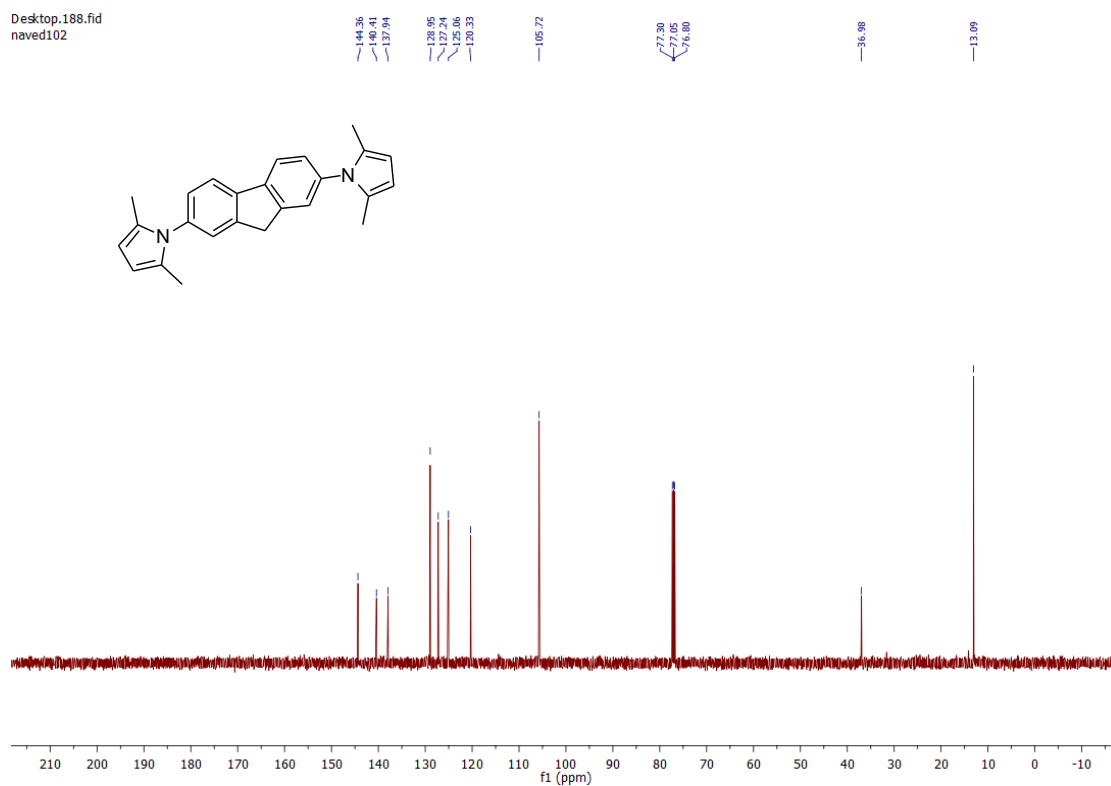

# <sup>1</sup>H-NMR spectrum of compound 35

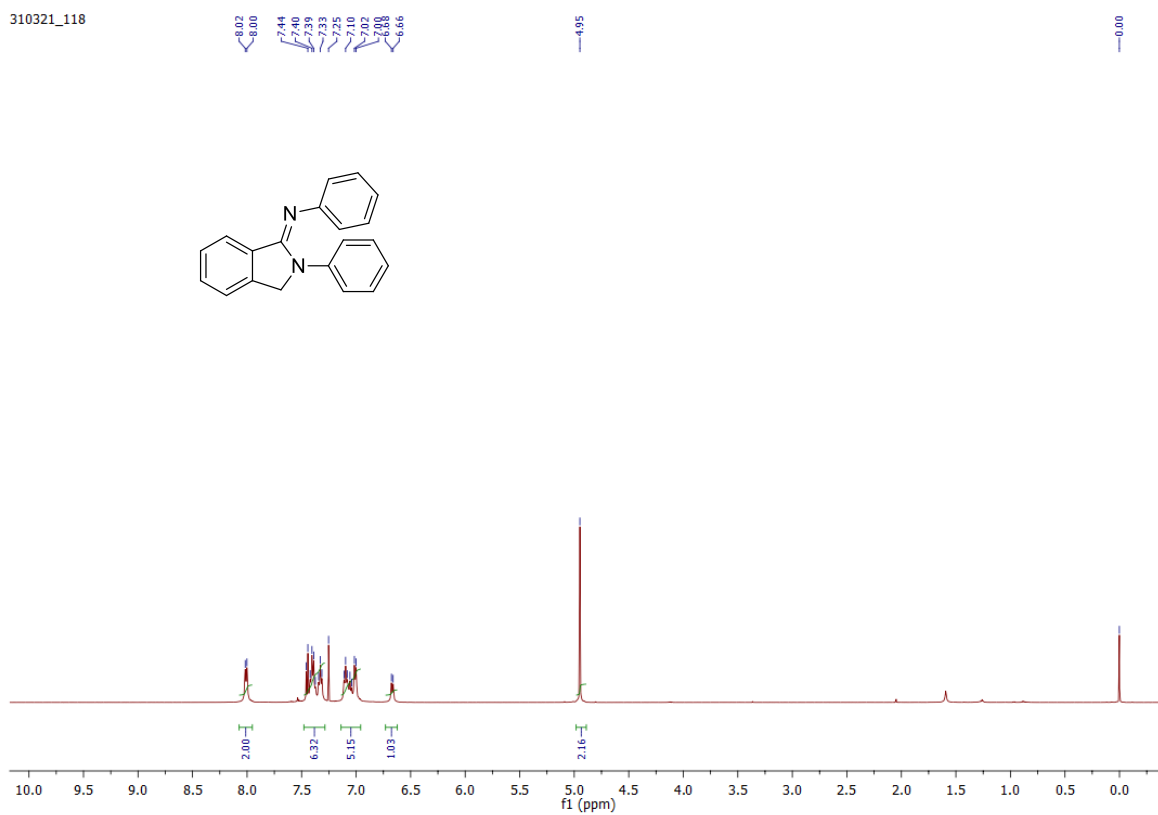

# <sup>1</sup>H-NMR spectrum of compound 37

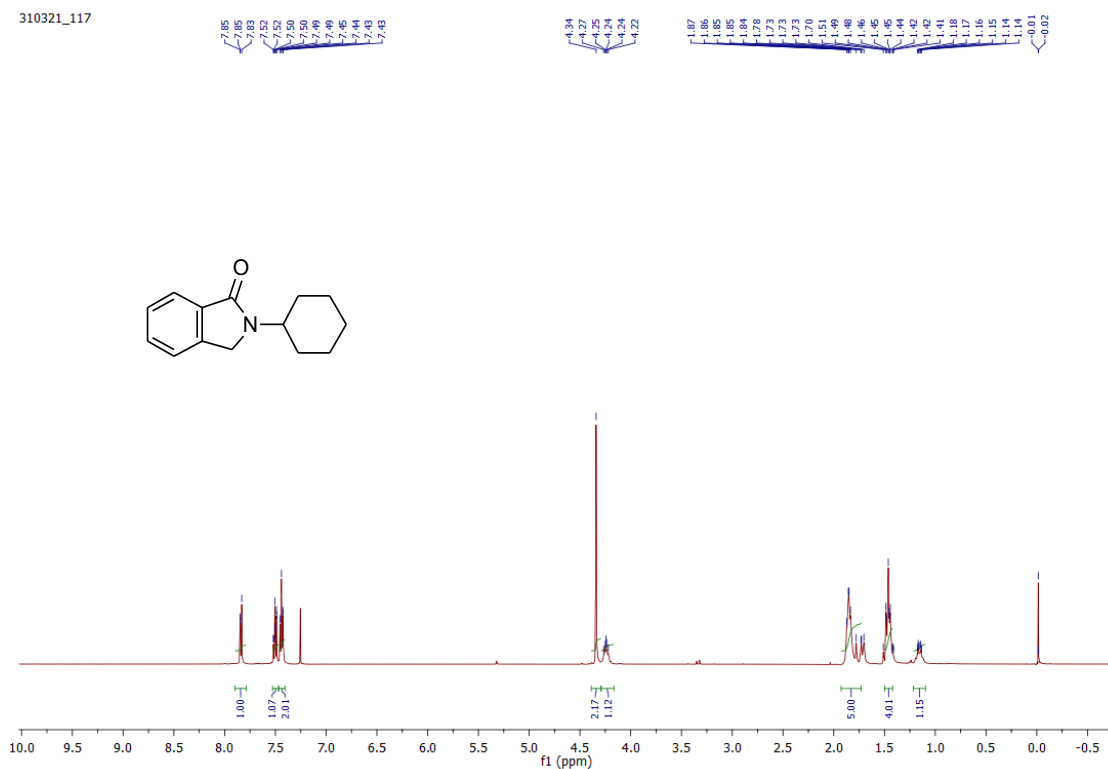

Supplement: d1ob01618k1.pdf [file d1ob01618k1.pdf]
